# Supplementary material for: A dual sensor of fluorescent and colorimetric for the rapid detection of lead
Source: Royal Society of Chemistry journal article supplement (doi:10.1039/c2an16148f), 2012-01-01
Supplement: c2an16148f.pdf [file c2an16148f.pdf]

# A dual sensor of fluorescent and colorimetric for lead instantly detecting

Jien Yang<sup>a</sup>, Chunjie Zhou<sup>a</sup>, Chao Liu<sup>a</sup>, Yuliang Li<sup>a\*</sup>, Huibiao Liu<sup>a</sup>, Yongjun Li<sup>a</sup> and Daoben Zhu<sup>a\*</sup>

Supporting Information.

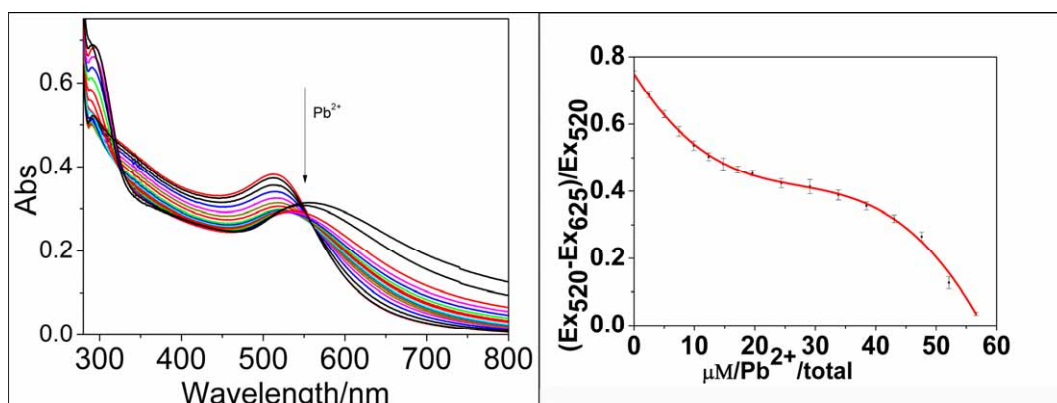

Fig. S1. Analyses of river water samples using the gold nanoparticles probe. The samples were spiked with Pb<sup>2+</sup> ions at concentrations of 0-60 μM. Error bars represent standard deviations from five repeated experiments. Other conditions were the same as those used to obtain Fig.1.

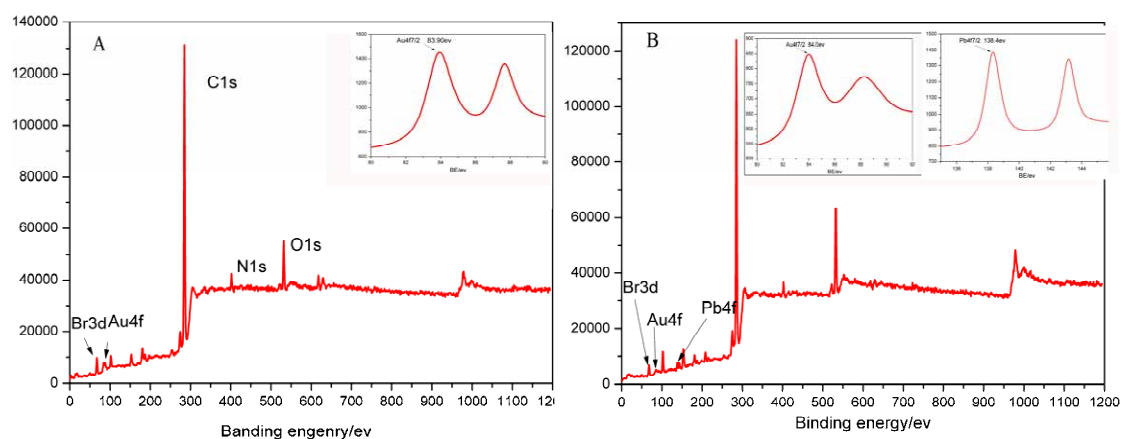

Fig S2. X-ray photoelectron spectroscopy. The samples were prepared by casting a drop of gold nanoparticles solution on glass and evaporated the solvent. (A) XPS of gold nanoparticles solution; (B) XPS of gold nanoparticles interact with Pb<sup>2+</sup>. The inset figures are corresponding fine XPS signals of gold and lead.

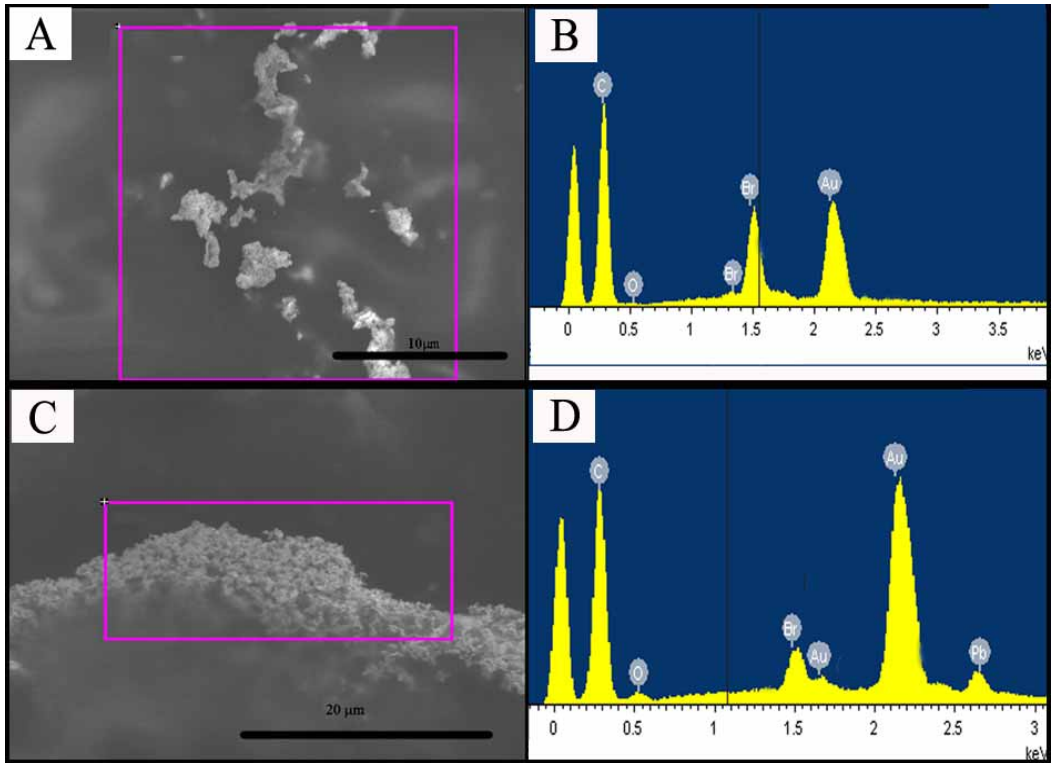

Fig S3. EDS of gold nanoparticles and the gold nanoparticles react with  $Pb^{2+}$ . (A, C) The SEM images of the samples corresponding to gold nanoparticles and gold nanoparticles react with  $Pb^{2+}$  respectively; (B, D) The EDS of the samples corresponding to gold nanoparticles and gold nanoparticles react with  $Pb^{2+}$  respectively. The samples were prepared by casting a drop of gold nanoparticles solution on glass and evaporated the solvent.

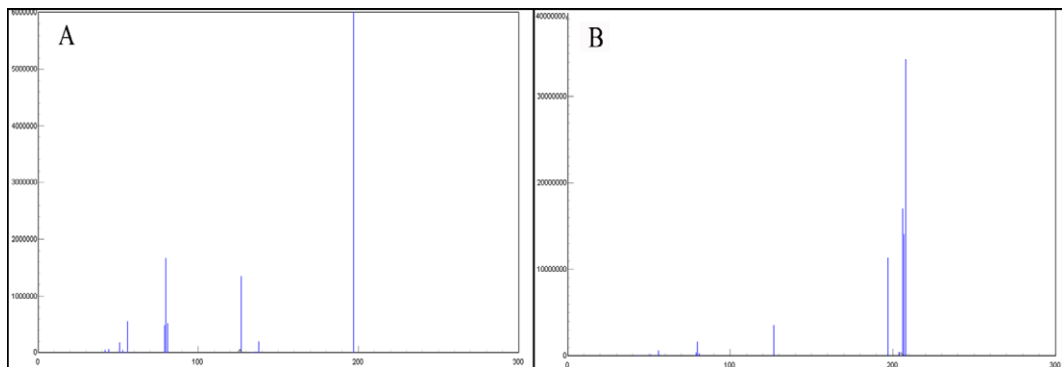

Fig. S4. ICP-MS. (A). ICP-MS of gold nanoparticles; (B) IPC-MS of gold nanoparticles after  $Pb^{2+}$  addition. Au at 197 and Pb at 206 with three isotope peaks.
